# Supplementary material
Source: publisher figshare collection journal article supplement (https://rs.figshare.com/ndownloader/files/14050478)
Supplement: Supplementary file 1 [file 14050478]

## Sheet: Sheet1
Table S9. Comparison of ages obtained from three dating analyses i) inferred from the unreduced decisive amino-acid dataset, ii) inferred from the reduced amino-acid dataset (95% coverage per site, see method section), and iii) inferred from the reduced amino-acid dataset, but with alternate minimum calibration ages. We compare the posterior mean ages, lower and upper 95% CIs of selected major cl…
Selected taxa	Original minimum calibration age	Alternate minimum calibration age	Ages inferred with original calibrations						Ages inferred with alternative calibrations
			Unreduced dataset			Reduced dataset
			Mean age	Lower 95% CI	Upper 95% CI	Mean age	Lower 95% CI	Upper 95% CI	Mean age	Lower 95% CI	Upper 95% CI
Alexarasnia rossica	254.1	258.6	270.6	251	294.9	272.7	251.7	299.9	273.9	254.7	300.2
Gyna obesa	60	57.7	129.6	113.9	147.4	140.9	122.9	160	141.3	123.4	160.2
Valditermes brenanae	130.8	130.3	128.5	115.7	140.4	133.8	121.5	148.4	133.8	121.3	148.8
Crown-Dictyoptera	NA	NA	263.7	232.2	291.2	263	232.8	292.5	263.6	233.8	292.9
Crown-Blattodea	NA	NA	195	176.1	216.1	204.86	184.5	227.9	205.6	185.5	228.5
Crown-Corydioidea	NA	NA	155.3	138.3	172.3	164.3	146	184.1	164.5	146.1	184.6
Crown-Kittrickea	NA	NA	145.7	131.5	160.3	152	137.6	168.9	152.1	137.6	169.2
Crown-Isoptera	NA	NA	113.8	102	124.7	114.2	102.6	148.4	114.2	102.2	127.1
Crown-Blaberoidea	NA	NA	153.5	136	173.2	166.2	146.7	187.8	166.6	147.5	188.1
Pseudophyllodromiinae + Anallacta	NA	NA	131.2	115.2	148.9	141.9	124.1	161.1	142.3	124.6	161.5
Crown-Blaberidae	NA	NA	83.1	69.8	98.2	90.8	75.5	109.1	91.1	75.5	110.4
